# Supplementary material
Source: publisher figshare collection journal article supplement (https://acs.figshare.com/ndownloader/files/4201798)

# checkCIF/PLATON report

You have not supplied any structure factors. As a result the full set of tests cannot be run.

No syntax errors found.      CIF dictionary      Interpreting this report

## Datablock: I

---

|                 |                                                          |                                |             |
|-----------------|----------------------------------------------------------|--------------------------------|-------------|
| Bond precision: | C-C = 0.0132 Å                                           | Wavelength=1.54178             |             |
| Cell:           | a=29.2846(9)                                             | b=29.2846(9)                   | c=9.9941(4) |
|                 | alpha=90                                                 | beta=90                        | gamma=90    |
| Temperature:    | 293 K                                                    |                                |             |
|                 | Calculated                                               | Reported                       |             |
| Volume          | 8570.8(6)                                                | 8570.8(5)                      |             |
| Space group     | P 4/n                                                    | P4/n                           |             |
| Hall group      | -P 4a                                                    | ?                              |             |
| Moiety formula  | 4(C30 H14 Cd Cl2 Cu2 O13),<br>2(C44 H36 Cu N8), 2(O0.50) | ?                              |             |
| Sum formula     | C208 H128 Cd4 Cl8 Cu10 N16 O53                           | C104 H64 Cd2 Cl4 Cu5 N8 O26.50 |             |
| Mr              | 5068.00                                                  | 2533.93                        |             |
| Dx,g cm-3       | 0.982                                                    | 0.982                          |             |
| Z               | 1                                                        | 2                              |             |
| Mu (mm-1)       | 3.597                                                    | 3.597                          |             |
| F000            | 2530.0                                                   | 2530.0                         |             |
| F000'           | 2520.41                                                  |                                |             |
| h,k,lmax        | 32,32,11                                                 | 32,30,10                       |             |
| Nref            | 6152                                                     | 5869                           |             |
| Tmin,Tmax       | 0.682,0.698                                              | 0.533,0.715                    |             |
| Tmin'           | 0.464                                                    |                                |             |

Correction method= MULTI-SCAN

Data completeness= 0.954      Theta(max)= 58.920

R(reflections)= 0.0688( 2937)      wR2(reflections)= 0.1508( 5869)

S = 1.044      Npar= 350

---

The following ALERTS were generated. Each ALERT has the format

**test-name\_ALERT\_alert-type\_alert-level.**

Click on the hyperlinks for more details of the test.

---

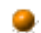

### Alert level B

THETM01\_ALERT\_3\_B The value of sine(theta\_max)/wavelength is less than 0.575

Calculated sin(theta\_max)/wavelength = 0.5555  
 PLAT023\_ALERT\_3\_B Resolution (too) Low [sin(theta)/Lambda < 0.6].. 58.92 Deg.  
 PLAT029\_ALERT\_3\_B \_diffrn\_measured\_fraction\_theta\_full Low ..... 0.954  
 PLAT049\_ALERT\_1\_B Calculated Density less than 1.0 gcm-3 ..... 0.9819  
 PLAT230\_ALERT\_2\_B Hirshfeld Test Diff for 0010 -- C023\_f .. 9.2 su

### ● Alert level C

PLAT045\_ALERT\_1\_C Calculated and Reported Z Differ by ..... 0.50 Ratio  
 PLAT048\_ALERT\_1\_C MoietyFormula Not Given ..... ?  
 PLAT125\_ALERT\_4\_C No '\_symmetry\_space\_group\_name\_Hall' Given ..... ?  
 PLAT220\_ALERT\_2\_C Large Non-Solvent O Ueq(max)/Ueq(min) ... 3.4 Ratio  
 PLAT232\_ALERT\_2\_C Hirshfeld Test Diff (M-X) Cu02 -- 0007 .. 6.0 su  
 PLAT232\_ALERT\_2\_C Hirshfeld Test Diff (M-X) Cu02 -- 0010 .. 9.6 su  
 PLAT232\_ALERT\_2\_C Hirshfeld Test Diff (M-X) Cu02 -- C023\_f .. 6.5 su  
 PLAT234\_ALERT\_4\_C Large Hirshfeld Difference Cd01 -- Cl4A .. 0.18 Ang.  
 PLAT234\_ALERT\_4\_C Large Hirshfeld Difference C024 -- C030 .. 0.18 Ang.  
 PLAT234\_ALERT\_4\_C Large Hirshfeld Difference C032 -- C033 .. 0.17 Ang.  
 PLAT241\_ALERT\_2\_C Check High Ueq as Compared to Neighbors for C038  
 PLAT242\_ALERT\_2\_C Check Low Ueq as Compared to Neighbors for Cd01  
 PLAT242\_ALERT\_2\_C Check Low Ueq as Compared to Neighbors for Cu02  
 PLAT242\_ALERT\_2\_C Check Low Ueq as Compared to Neighbors for C033  
 PLAT311\_ALERT\_2\_C Isolated Disordered Oxygen Atom (No H's ?) .... \*O039  
 PLAT342\_ALERT\_3\_C Low Bond Precision on C-C Bonds ..... 0.0132 Ang  
 PLAT369\_ALERT\_2\_C Long C(sp2)-C(sp2) Bond C019 - C026 ... 1.54 Ang.  
 PLAT369\_ALERT\_2\_C Long C(sp2)-C(sp2) Bond C020 - C027 ... 1.53 Ang.

### ● Alert level G

REFLT03\_ALERT\_1\_G ALERT: Expected hkl max differ from CIF values  
 From the CIF: \_diffrn\_reflns\_theta\_max 58.92  
 From the CIF: \_reflns\_number\_total 5869  
 From the CIF: \_diffrn\_reflns\_limit\_max hkl 32. 29. 10.  
 From the CIF: \_diffrn\_reflns\_limit\_min hkl -32. -30. -8.  
 TEST1: Expected hkl limits for theta max  
 Calculated maximum hkl 32. 32. 11.  
 Calculated minimum hkl -32. -32. -11.  
 PLAT003\_ALERT\_2\_G Number of Uiso or Uij Restrained Atom Sites .... 39  
 PLAT004\_ALERT\_5\_G Info: Polymeric Structure Found with Dimension . 1  
 PLAT005\_ALERT\_5\_G No \_iucr\_refine\_instructions\_details in CIF .... ?  
 PLAT194\_ALERT\_1\_G Missing \_cell\_measurement\_reflns\_used datum .... ?  
 PLAT195\_ALERT\_1\_G Missing \_cell\_measurement\_theta\_max datum .... ?  
 PLAT196\_ALERT\_1\_G Missing \_cell\_measurement\_theta\_min datum .... ?  
 PLAT199\_ALERT\_1\_G Check the Reported \_cell\_measurement\_temperature 293 K  
 PLAT200\_ALERT\_1\_G Check the Reported \_diffrn\_ambient\_temperature 293 K  
 PLAT301\_ALERT\_3\_G Note: Main Residue Disorder ..... 5 Perc.  
 PLAT302\_ALERT\_4\_G Note: Anion/Solvent Disorder ..... 100 Perc.  
 PLAT606\_ALERT\_4\_G VERY LARGE Solvent Accessible VOID(S) in Structure !  
 PLAT720\_ALERT\_4\_G Number of Unusual/Non-Standard Labels ..... 55  
 PLAT764\_ALERT\_4\_G Overcomplete CIF Bond List Detected (Rep/Expd) . 1.16 Ratio  
 PLAT860\_ALERT\_3\_G Note: Number of Least-Squares Restraints ..... 482  
 PLAT869\_ALERT\_4\_G ALERTS Related to the use of SQUEEZE Suppressed !  
 PLAT951\_ALERT\_5\_G Reported and Calculated Kmax Values Differ by .. 2

0 ALERT level A = Most likely a serious problem - resolve or explain  
 5 ALERT level B = A potentially serious problem, consider carefully  
 18 ALERT level C = Check. Ensure it is not caused by an omission or oversight  
 17 ALERT level G = General information/check it is not something unexpected

9 ALERT type 1 CIF construction/syntax error, inconsistent or missing data

13 ALERT type 2 Indicator that the structure model may be wrong or deficient  
6 ALERT type 3 Indicator that the structure quality may be low  
9 ALERT type 4 Improvement, methodology, query or suggestion  
3 ALERT type 5 Informative message, check

---

## checkCIF publication errors

---

### Alert level A

PUBL004\_ALERT\_1\_A The contact author's name and address are missing,  
\_publ\_contact\_author\_name and \_publ\_contact\_author\_address.  
PUBL005\_ALERT\_1\_A \_publ\_contact\_author\_email, \_publ\_contact\_author\_fax and  
\_publ\_contact\_author\_phone are all missing.  
At least one of these should be present.  
PUBL006\_ALERT\_1\_A \_publ\_requested\_journal is missing  
e.g. 'Acta Crystallographica Section C'  
PUBL008\_ALERT\_1\_A \_publ\_section\_title is missing. Title of paper.  
PUBL009\_ALERT\_1\_A \_publ\_author\_name is missing. List of author(s) name(s).  
PUBL010\_ALERT\_1\_A \_publ\_author\_address is missing. Author(s) address(es).  
PUBL012\_ALERT\_1\_A \_publ\_section\_abstract is missing.  
Abstract of paper in English.

---

### Alert level G

PUBL013\_ALERT\_1\_G The \_publ\_section\_comment (discussion of study) is  
missing. This is required for a full paper submission (but is  
optional for an electronic paper).

---

7 **ALERT level A** = Data missing that is essential or data in wrong format  
1 **ALERT level G** = General alerts. Data that may be required is missing

---

## Publication of your CIF

You should attempt to resolve as many as possible of the alerts in all categories. Often the minor alerts point to easily fixed oversights, errors and omissions in your CIF or refinement strategy, so attention to these fine details can be worthwhile. In order to resolve some of the more serious problems it may be necessary to carry out additional measurements or structure refinements. However, the nature of your study may justify the reported deviations from journal submission requirements and the more serious of these should be commented upon in the discussion or experimental section of a paper or in the "special\_details" fields of the CIF. *checkCIF* was carefully designed to identify outliers and unusual parameters, but every test has its limitations and alerts that are not important in a particular case may appear. Conversely, the absence of alerts does not guarantee there are no aspects of the results needing attention. It is up to the individual to critically assess their own results and, if necessary, seek expert advice.

If level A alerts remain, which you believe to be justified deviations, and you intend to submit this CIF for publication in Acta Crystallographica Section C or Section E, you should additionally insert an explanation in your CIF using the Validation Reply Form (VRF) below. Your explanation will be considered as part of the review process.

If you intend to submit to another section of Acta Crystallographica or Journal of Applied Crystallography or Journal of Synchrotron Radiation, you should make sure that at least a basic structural check is run on the final version of your CIF prior to submission.

```
# start Validation Reply Form
_vrf_PUBL004_GLOBAL
;
PROBLEM: The contact author's name and address are missing,
RESPONSE: ...
;
_vrf_PUBL005_GLOBAL
;
PROBLEM: _publ_contact_author_email, _publ_contact_author_fax and
RESPONSE: ...
;
_vrf_PUBL006_GLOBAL
;
PROBLEM: _publ_requested_journal is missing
RESPONSE: ...
;
_vrf_PUBL008_GLOBAL
;
PROBLEM: _publ_section_title is missing. Title of paper.
RESPONSE: ...
;
_vrf_PUBL009_GLOBAL
;
PROBLEM: _publ_author_name is missing. List of author(s) name(s).
RESPONSE: ...
;
_vrf_PUBL010_GLOBAL
;
PROBLEM: _publ_author_address is missing. Author(s) address(es).
RESPONSE: ...
;
_vrf_PUBL012_GLOBAL
;
```

PROBLEM: \_publ\_section\_abstract is missing.  
RESPONSE: ...  
;  
# end Validation Reply Form

If you wish to submit your CIF for publication in Acta Crystallographica Section C or E, you should upload your CIF via the web. If your CIF is to form part of a submission to another IUCr journal, you will be asked, either during electronic submission or by the Co-editor handling your paper, to upload your CIF via our web site.

**PLATON version of 18/07/2011; check.def file version of 04/07/2011**

Datablock I - ellipsoid plot

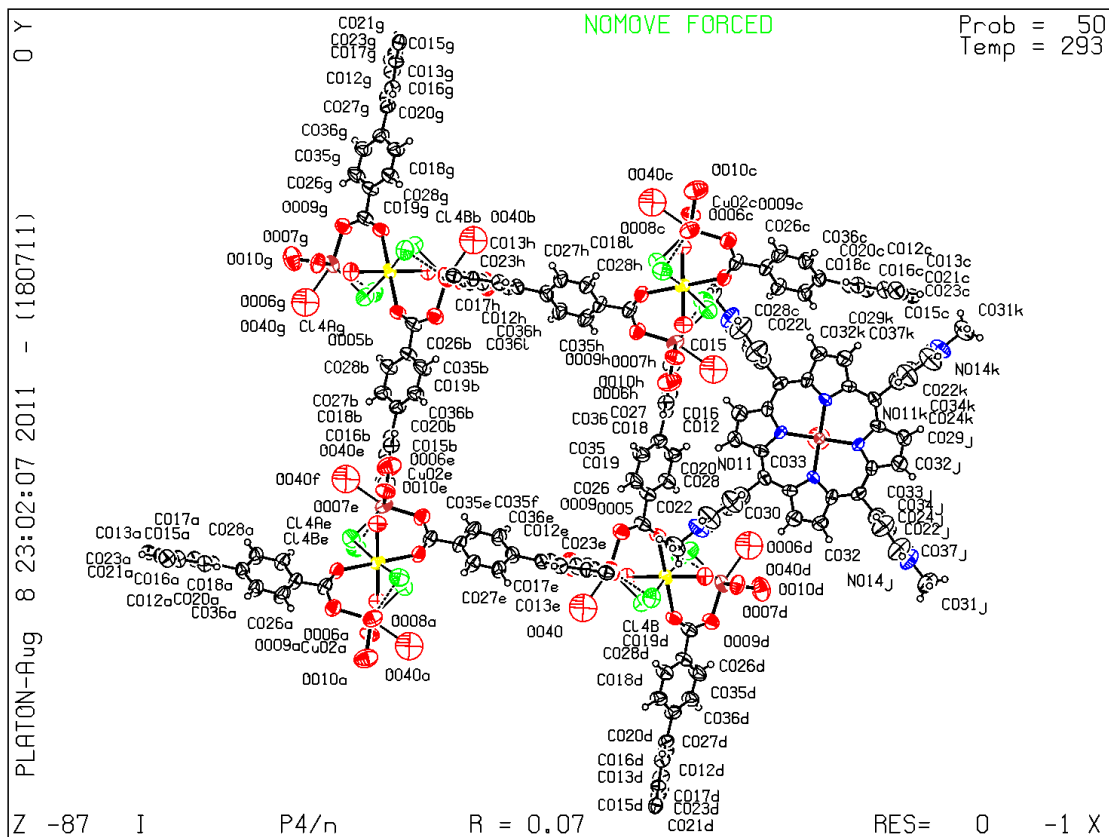

Supplement: Supplementary file 1 [file 4201798]
